# Supplementary material for: Downregulation of COL12A1 and COL13A1 by a selective EP2 receptor agonist, omidenepag, in human trabecular meshwork cells
Source: PLoS One. 2023 Jan 11;18(1):e0280331. doi: 10.1371/journal.pone.0280331 (PMC9833537; doi:10.1371/journal.pone.0280331)
Supplement: S1 File — (XLSX) [file pone.0280331.s002.xlsx]

## Sheet: Analysis
							Minus blank						% change from vehicle
	Blank	Vehicle	0.01 uM omd	0.1 uM OMD	1 uM omd			Vehicle	0.01 uM omd	0.1 uM OMD	1 uM omd			Vehicle	10 nM	100 nM	1 µM
	0.0780218	0.967824	1.00977	0.96088	0.962552		#1	0.890615	0.93256	0.883671	0.885343		#1	106.106	111.103	105.279	105.478
	0.0766598	0.901612	0.973342	0.915129	0.912024		#2	0.824404	0.896133	0.83792	0.834815		#2	98.2179	106.764	99.8282	99.4583
	0.0762372	0.9147	0.966173	0.90339	0.926622		#3	0.837491	0.888964	0.826182	0.849413		#3	99.7772	105.91	98.4298	101.198
	0.0766736	0.927895	0.944946	0.890964	0.894421		#4	0.850686	0.867737	0.813756	0.817212		#4	101.349	103.381	96.9493	97.3611
	0.0771297	0.932479	0.922454	0.921116	0.902588		#5	0.85527	0.845245	0.843907	0.825379		#5	101.895	100.701	100.542	98.3341
	0.0785302	0.854912	0.963959	0.919766	0.899893		#6	0.777704	0.88675	0.842558	0.822684		#6	92.6542	105.646	100.381	98.013
							AVG	0.839	0.886	0.841	0.839		AVG	100	105.6	100.2	100
							S.E.	0.0153158	0.0119359	0.00966495	0.0103279		S.E.	1.8247	1.42203	1.15146	1.23045

## Sheet: List ; Plates 1 - 1
Plate	Repeat	Well	Type	Time	Absorbance @ 490 (1.0s) (A)
1	1	B01	M	00:00:18.850000	0.0780218
1	1	B02	M	00:00:20.130000	0.967824
1	1	B03	M	00:00:21.410000	1.00977
1	1	B04	M	00:00:22.690000	0.96088
1	1	B05	M	00:00:23.970000	0.962552
1	1	B06	M	00:00:25.250000	1.02492
1	1	B07	M	00:00:26.530000	0.967657
1	1	B08	M	00:00:27.810000	0.0352191
1	1	B09	M	00:00:29.090000	0.0348329
1	1	B10	M	00:00:30.370000	0.0342687
1	1	B11	M	00:00:31.650000	0.0345681
1	1	C01	M	00:00:35.290000	0.0766598
1	1	C02	M	00:00:36.570000	0.901612
1	1	C03	M	00:00:37.850000	0.973342
1	1	C04	M	00:00:39.130000	0.915129
1	1	C05	M	00:00:40.410000	0.912024
1	1	C06	M	00:00:41.690000	0.965412
1	1	C07	M	00:00:42.970000	0.932254
1	1	C08	M	00:00:44.250000	0.0347715
1	1	C09	M	00:00:45.530000	0.0349646
1	1	C10	M	00:00:46.810000	0.0354096
1	1	C11	M	00:00:48.090000	0.0360312
1	1	D01	M	00:00:51.730000	0.0762372
1	1	D02	M	00:00:53.010000	0.9147
1	1	D03	M	00:00:54.290000	0.966173
1	1	D04	M	00:00:55.570000	0.90339
1	1	D05	M	00:00:56.850000	0.926622
1	1	D06	M	00:00:58.130000	0.956522
1	1	D07	M	00:00:59.410000	0.961998
1	1	D08	M	00:01:00.690000	0.0347297
1	1	D09	M	00:01:01.970000	0.0352108
1	1	D10	M	00:01:03.250000	0.0379025
1	1	D11	M	00:01:04.530000	0.035118
1	1	E01	M	00:01:08.170000	0.0766736
1	1	E02	M	00:01:09.450000	0.927895
1	1	E03	M	00:01:10.730000	0.944946
1	1	E04	M	00:01:12.010000	0.890964
1	1	E05	M	00:01:13.290000	0.894421
1	1	E06	M	00:01:14.570000	0.922292
1	1	E07	M	00:01:15.850000	0.922093
1	1	E08	M	00:01:17.130000	0.0338082
1	1	E09	M	00:01:18.410000	0.0343404
1	1	E10	M	00:01:19.690000	0.0348747
1	1	E11	M	00:01:20.970000	0.0383541
1	1	F01	M	00:01:24.610000	0.0771297
1	1	F02	M	00:01:25.890000	0.932479
1	1	F03	M	00:01:27.170000	0.922454
1	1	F04	M	00:01:28.450000	0.921116
1	1	F05	M	00:01:29.730000	0.902588
1	1	F06	M	00:01:31.010000	0.953172
1	1	F07	M	00:01:32.290000	0.888898
1	1	F08	M	00:01:33.570000	0.0368307
1	1	F09	M	00:01:34.850000	0.0336518
1	1	F10	M	00:01:36.130000	0.0387829
1	1	F11	M	00:01:37.410000	0.035434
1	1	G01	M	00:01:41.050000	0.0785302
1	1	G02	M	00:01:42.330000	0.854912
1	1	G03	M	00:01:43.610000	0.963959
1	1	G04	M	00:01:44.890000	0.919766
1	1	G05	M	00:01:46.170000	0.899893
1	1	G06	M	00:01:47.450000	0.964042
1	1	G07	M	00:01:48.730000	0.883242
1	1	G08	M	00:01:50.010000	0.0348231
1	1	G09	M	00:01:51.290000	0.0342708
1	1	G10	M	00:01:52.570000	0.0351013
1	1	G11	M	00:01:53.850000	0.03364

## Sheet: Plate
Plate	Repeat	End time	Start temp.	End temp.	BarCode
1	1	10:13:04	25.7	25.6	N/A
Absorbance @ 490 (1.0s) (A)
0.000
0.0780218	0.967824	1.00977	0.96088	0.962552	1.02492	0.967657	0.0352191	0.0348329	0.0342687	0.0345681
0.0766598	0.901612	0.973342	0.915129	0.912024	0.965412	0.932254	0.0347715	0.0349646	0.0354096	0.0360312
0.0762372	0.9147	0.966173	0.90339	0.926622	0.956522	0.961998	0.0347297	0.0352108	0.0379025	0.035118
0.0766736	0.927895	0.944946	0.890964	0.894421	0.922292	0.922093	0.0338082	0.0343404	0.0348747	0.0383541
0.0771297	0.932479	0.922454	0.921116	0.902588	0.953172	0.888898	0.0368307	0.0336518	0.0387829	0.035434
0.0785302	0.854912	0.963959	0.919766	0.899893	0.964042	0.883242	0.0348231	0.0342708	0.0351013	0.03364

## Sheet: Protocol
Protocol description
Protocol name ..................... MTSassay 490
Protocol number ................... N/A
Name of the plate type ............ Generic 8x12 size plate
Number of repeats ................. 1
Delay between repeats ............. 0 s
Measurement height ................ Default
Protocol notes ....................
Shaking duration .................. 1.0 s
Shaking speed ..................... Fast
Shaking diameter .................. 0.10 mm
Shaking type ...................... Linear
Repeated operation ................ Yes
Name of the label ................. Absorbance @ 490 (1.0s)
Label technology .................. Photometry
CW-lamp filter name ............... P490
CW-lamp filter slot ............... A3
Measurement time .................. 1.0 s
Excitation Aperture ............... N/A
Plate map of plate 1
A | E E E E E E E E E E E E
B | M M M M M M M M M M M E
C | M M M M M M M M M M M E
D | M M M M M M M M M M M E
E | M M M M M M M M M M M E
F | M M M M M M M M M M M E
G | M M M M M M M M M M M E
H | E E E E E E E E E E E E
